# Supplementary material for: Digital Tools in Behavior Change Support Education in Health and Other Students: A Systematic Review
Source: Healthcare (Basel). 2021 Dec 21;10(1):1. doi: 10.3390/healthcare10010001 (PMC8774876; doi:10.3390/healthcare10010001)
Supplement: Supplementary file 1 [file healthcare-10-00001-s001.zip]

Archive with 6 entries (6 files):
- Supplementary Material 1 (Search strategy in databases).pdf
- Supplementary Material 2 (Number of records in databases).pdf
- Supplementary Material 3 (List of excluded studies).pdf
- Supplementary Material 4 (Basic characteristics of the included studies).pdf
- Supplementary Material 5 (PRISMA 2020 Checklist ).pdf
- Supplementary Material 6 (MMAT Score).pdf
