# Supplementary material for: Digital Tools in Behavior Change Support Education in Health and Other Students: A Systematic Review
Source: Healthcare (Basel). 2021 Dec 21;10(1):1. doi: 10.3390/healthcare10010001 (PMC8774876; doi:10.3390/healthcare10010001)
Supplement: Supplementary file 1 [file healthcare-10-00001-s001.zip › Supplementary Material 2 (Number of records in databases).pdf]

## Supplementary Material 2

**Table S2.** Number of records in databases.

| #                       | Keywords                                                                                                                                                                                                                                                                                                                                                                                                            | PubMed    | CINAHL  | MEDLINE   | Web of Science | SAGE      | Scopus    | Cochrane Library |
|-------------------------|---------------------------------------------------------------------------------------------------------------------------------------------------------------------------------------------------------------------------------------------------------------------------------------------------------------------------------------------------------------------------------------------------------------------|-----------|---------|-----------|----------------|-----------|-----------|------------------|
| 1                       | "nurs* student*" OR "health care student*" OR "pharmacy student*" OR "sport student"                                                                                                                                                                                                                                                                                                                                | 68.339    | 25.860  | 22.786    | 21.332         | 69        | 40.470    | 190              |
| 2                       | "pedagogical method" OR "e-learning cours*" OR "online cours*" OR "MOOC" OR "case stud*" OR "simulation*" OR "virtual patient"                                                                                                                                                                                                                                                                                      | 664.826   | 133.870 | 662.744   | 3.576.738      | 128.005   | 4.962.420 | 12.310           |
| 3                       | "knowledge*" OR "motivation*" OR "engagement*" OR "skill*" OR "competence*" OR "self-care" OR "self-management" OR "change the behaviour" OR "change attitudes" OR "behaviour change" OR "behavior change" OR "behaviour change techniques" OR "behavior change techniques" OR "health behaviour" OR "health behavior"                                                                                              | 2.106.179 | 641.402 | 1.451.603 | 2.896.042      | 1.097.901 | 3.701.711 | 99.979           |
| 4                       | "non-communicable disease" OR "chronic disease*" OR "chronic illness" OR "coronary disease" OR "coronary artery disease" OR "heart disease" OR "heart failure" OR "cardiovascular disease" OR "high blood pressure" OR "hypertension" OR "diabetes mellitus type 2" OR "ischemic heart disease" OR "type 2 diabetes" OR "non-insulin-dependent diabetes" OR "adult-onset diabetes" OR "NIDDM" OR "T2D" OR "obesity" | 1.892.886 | 561.852 | 2.019.238 | 1.758.741      | 211.808   | 2.670.902 | 225.030          |
| #1 AND #2 AND #3 AND #4 |                                                                                                                                                                                                                                                                                                                                                                                                                     | 66        | 22      | 34        | 37             | 15        | 62        | 0                |
