# Supplementary material for: Digital Tools in Behavior Change Support Education in Health and Other Students: A Systematic Review
Source: Healthcare (Basel). 2021 Dec 21;10(1):1. doi: 10.3390/healthcare10010001 (PMC8774876; doi:10.3390/healthcare10010001)
Supplement: Supplementary file 1 [file healthcare-10-00001-s001.zip › Supplementary Material 3 (List of excluded studies).pdf]

### Supplementary Material 3

**Table S3.** List of excluded studies.

| Author, year                 | Exclusion reason            |
|------------------------------|-----------------------------|
| Wu & Lin, 2011               | Language                    |
| Holzemer, et al., 1986       | Year of publication         |
| Cain & Piascik, 2015         | Inappropriate type of study |
| Newton & Krebs, 2020         | Inappropriate type of study |
| Vaona, et al., 2018          | Inappropriate type of study |
| Hernandez, 2019              | Inappropriate type of study |
| Harris, et al., 2020         | Inappropriate type of study |
| Miller, et al., 2020         | Inappropriate type of study |
| Lawn, et al., 2017           | Inappropriate type of study |
| Dorri, et al., 2019          | Substantive inadequacy      |
| Tawalbeh, 2020               | Substantive inadequacy      |
| van de Mortel, et al., 2017  | Substantive inadequacy      |
| Yousey & Faulkner, 2010      | Substantive inadequacy      |
| Romero-Collado, et al., 2020 | Substantive inadequacy      |
| Luo & Kalman, 2018           | Substantive inadequacy      |
| Dicks & Romanelli, 2019      | Substantive inadequacy      |
| Luo, et al., 2019            | Substantive inadequacy      |
| Consorti, et al., 2012       | Substantive inadequacy      |
| Isaza-Restrepo, et al., 2018 | Substantive inadequacy      |
| Kononowicz, et al., 2019     | Substantive inadequacy      |
| Barnett, et al., 2016        | Substantive inadequacy      |
| Walker & Gantt, 2010         | Substantive inadequacy      |
| Padilha, et al., 2019        | Substantive inadequacy      |
| Zeitoun, et al., 2014        | Substantive inadequacy      |
| Dukhi, et al., 2014          | Substantive inadequacy      |
| Odajima & Furuichi, 2020     | Substantive inadequacy      |
| Sandstrom, 2006              | Not available in full text  |
| Dacey, et al., 2010          | Not available in full text  |
| Scherer, et al., 2007        | Not available in full text  |
| Tilton, et al., 2015         | Not available in full text  |
| Mauro, et al., 2018          | Not available in full text  |
