# Supplementary material for: Digital Tools in Behavior Change Support Education in Health and Other Students: A Systematic Review
Source: Healthcare (Basel). 2021 Dec 21;10(1):1. doi: 10.3390/healthcare10010001 (PMC8774876; doi:10.3390/healthcare10010001)
Supplement: Supplementary file 1 [file healthcare-10-00001-s001.zip › Supplementary Material 6 (MMAT Score).pdf]

## Supplementary Material 6

**Table S6.** MMAT Score

| No. | Author, year                    | QUAL study |      |      |      |      | QUAN randomaized study |      |      |      |      | QUAN descriptive study |      |      |      |      | MMS  |      |      |      |      |
|-----|---------------------------------|------------|------|------|------|------|------------------------|------|------|------|------|------------------------|------|------|------|------|------|------|------|------|------|
|     |                                 | 1.1.       | 1.2. | 1.3. | 1.4. | 1.5. | 2.1.                   | 2.2. | 2.3. | 2.4. | 2.5. | 4.1.                   | 4.2. | 4.3. | 4.4. | 4.5. | 5.1. | 5.2. | 5.3. | 5.4. | 5.5. |
| 1   | Albrechtsen, et al., 2017 [35]  |            |      |      |      |      |                        |      |      |      |      | 1                      | 1    | 1    | 0    | 1    |      |      |      |      |      |
| 2   | Basak, et al., 2019 [36]        |            |      |      |      |      | 1                      | 1    | 1    | 0.5  | 1    |                        |      |      |      |      |      |      |      |      |      |
| 3   | Bolesta, et al., 2014 [37]      |            |      |      |      |      |                        |      |      |      |      | 1                      | 1    | 1    | 0    | 1    |      |      |      |      |      |
| 4   | Bonito, 2019 [38]               | 1          | 1    | 1    | 1    | 0    |                        |      |      |      |      |                        |      |      |      |      |      |      |      |      |      |
| 5   | Bowers, et al., 2017 [39]       |            |      |      |      |      | 0.5                    | 1    | 1    | 1    | 1    |                        |      |      |      |      |      |      |      |      |      |
| 6   | Coleman & McLaughlin, 2019 [40] | 1          | 1    | 1    | 0    | 1    |                        |      |      |      |      | 0.5                    | 0.5  | 1    | 0.5  | 1    | 1    | 1    | 0.5  | 0.5  | 0    |
| 7   | Delea, et al., 2010 [41]        |            |      |      |      |      |                        |      |      |      |      | 1                      | 0.5  | 1    | 0    | 1    |      |      |      |      |      |
| 8   | Isaacs, et al., 2015 [42]       | 1          | 1    | 1    | 1    | 0.5  |                        |      |      |      |      | 1                      | 1    | 1    | 1    | 0.5  | 1    | 1    | 1    | 1    | 0.5  |
| 9   | Kolanczyk, et al., 2019 [43]    | 1          | 0.5  | 0.5  | 1    | 0.5  |                        |      |      |      |      | 1                      | 0.5  | 0.5  | 1    | 1    | 1    | 1    | 1    | 0.5  | 0.5  |
| 10  | Moule, et al., 2015 [44]        | 1          | 1    | 1    | 0.5  | 0    |                        |      |      |      |      | 1                      | 1    | 1    | 0.5  | 0    | 1    | 1    | 1    | 0.5  | 0    |
| 11  | Padilha, et al., 2021 [45]      |            |      |      |      |      |                        |      |      |      |      | 1                      | 1    | 1    | 0    | 1    |      |      |      |      |      |
| 12  | Pharm Cowart, et al., 2021 [46] | 1          | 1    | 1    | 1    | 0    |                        |      |      |      |      | 1                      | 1    | 1    | 1    | 0    | 1    | 1    | 1    | 1    | 0    |
| 13  | Schultze, et al., 2019 [47]     |            |      |      |      |      |                        |      |      |      |      | 1                      | 1    | 1    | 0    | 1    |      |      |      |      |      |
| 14  | Sweigart, et al., 2014 [48]     | 1          | 1    | 0.5  | 0.5  | 1    |                        |      |      |      |      | 1                      | 1    | 0.5  | 0.5  | 1    | 1    | 1    | 0.5  | 0    | 0    |
| 15  | Vyas, et al., 2010 [49]         |            |      |      |      |      |                        |      |      |      |      | 0.5                    | 1    | 1    | 0    | 1    |      |      |      |      |      |
